# Supplementary material
Source: Research Square preprint supplement (doi:10.21203/rs.3.rs-10110471/v1)
Supplement: Supplementary file 1 [file f599b78ff0c5ff9bb51e447f.docx]

**1. Geometric Modeling and Solvability Analysis of the Marker**

Recovering the three-dimensional pose of a known object from a single X-ray projection image is a fundamental task in computer-assisted surgery, industrial inspection, and nondestructive evaluation.For example, for an ellipsoidal target, the projection equation can yield a closed-form pose solution when its dimensions are known. However, such symmetric targets generally produce a finite number of ambiguous solutions—typically two—due to the inherent reflection symmetry of the projected quadric surface.[1,2]

In this study, we designed a marker consisting of a central cube with four cylindrical protrusions oriented toward the vertices of a regular tetrahedron. The four cylinders have distinct and known radii, satisfying r₁ < r₂ < r₃ < r₄ , and share a common length L.This geometric configuration offers three key advantages for single-view pose estimation:

(i) the four axes form a set of non-coplanar spatial lines, whose vanishing directions can be used to constrain the rotation matrix;

(ii) the known radii provide absolute scale and depth information through the apparent widths of the projected cylinders; and

(iii) the asymmetry introduced by the unequal radii eliminates the reflection ambiguity that is typical of symmetric targets.

This appendix presents a complete analytical and algorithmic framework to show that, under the assumption of a calibrated X-ray source and projection plane, a full six-degree-of-freedom pose—three rotational and three translational parameters—can be uniquely determined from a single X-ray image alone.

**1.1 X-ray Imaging Geometry**

We adopt the standard pinhole camera model to describe X-ray projection, which provides a reasonable approximation for small-focal-spot cone-beam imaging geometry. Let the X-ray source be located at the origin of the camera coordinate system, and let the detector plane be placed at , where is the known source-to-detector distance. A 3D point with （）is projected onto the image pointaccording to the perspective transformation:

Assuming that the intrinsic parameters (the focal length and the principal point) have been calibrated, we may carry out the analysis in normalized image coordinates without loss of generality.

**1.2 Marker Geometry in the Object Coordinate System**

The marker is defined in its own coordinate system (the object coordinate system), with the origin located at the geometric center of the cube.Four cylinders extend from the center along unit direction vectors .These directions are chosen to point toward the vertices of a regular tetrahedron. Consequently, any three of these vectors are linearly independent, and the angle between any pair is .Each cylinder has a unique radius satisfying and a common length , both assumed to be known a priori. The distinct radii allow each cylinder to be identified unambiguously from its projected width.

The rigid transformation from the object coordinate system to the camera coordinate system is parameterized by a rotation matrix and a translation vector .A point on the marker is mapped to camera coordinates as .Our goal is to estimate from a single X-ray image.

**1.3 Pose Estimation from a Single Cylinder**

Before discussing the combination of multiple cylinders, we first review the geometric constraints provided by the projection of a single known cylinder, which serves as the basic building block of the pose recovery algorithm.Consider a cylinder whose axis direction in the camera coordinate system is **,**where is a unit vector in the object coordinate system. The cylinder axis passes through the center point in the camera coordinate system. This axis is a 3D line and can be parameterized as ， .Its perspective projection onto the image plane is a line , which can be obtained by eliminating . The direction of is determined by the vanishing point corresponding to the direction :

Here we assume. Therefore, the direction of the projected axis directly constrains the ratios and ,that is, the two degrees of freedom of the direction vector .

Under a calibrated pinhole camera model, let the focal length be (if image coordinates are measured in pixels, then is interpreted as the effective focal length in pixels), and assume the principal point is located at the image center. After principal-point normalization, let the image coordinates of the vanishing point be denoted by . From perspective projection geometry, all spatial lines parallel to the direction intersect in the image at the same vanishing point , and the ray from the projection center to that vanishing point has the same direction as . Therefore, in the camera coordinate system, one may take the unnormalized direction vector as:

The corresponding unit direction vector is then

This unit vector will be used directly in the subsequent computation of the projected width of the cylindrical lateral surface.

The lateral surface of the cylinder consists of points satisfying the following equation:

where r is the known radius, is an arbitrary reference point on the cylinder axis (typically chosen as the geometric center of the cube), and is the unit direction vector of the axis.The visual boundary of the cylinder in the image is formed by the intersections of the detector plane with two planes that both pass through the X-ray source and are tangent to the cylinder. These two planes generate two image lines and , which are symmetric about the projected axis line . The distance between and , measured perpendicular to the direction of , can be derived from the tangency condition as a function of the cylinder radius r and its spatial pose parameters.We examined the depth range 10-40 cm and marker size 2 cm under the experimental conditions, and found that approximate formulas can introduce a maximum depth estimation error of about 2 mm. Therefore, we adopt the exact common-perpendicular depth formula to avoid systematic errors caused by the object size being non-negligible relative to the depth.Thus, for the center point , the projected width is given by:

where is the unit vector along the optical axis. This formula shows directly that, given the known radius and the measured width, one obtains a constraint on the depth of the reference point as well as on the pose parameters .It is worth noting that the width does not depend on the specific position of the chosen reference point along the cylinder axis, and therefore possesses the geometric invariance required for pose estimation.

### **1.4 Pose Estimation from Multiple Cylinders**

The four cylinders together provide sufficient constraints to uniquely determine the 6-DoF pose. The solution procedure is divided into two steps: first, the rotation is estimated from the axis directions; second, the translation is recovered using the width constraints.

Rotation estimation:From the X-ray image, we extract the projected centerline of each cylinder, for . The direction of defines a normal vector , such that any point on satisfies .The vanishing point lies on , and satisfies .Hence, the direction must lie in the plane defined by the projection center and the image line . This yields the following homogeneous constraint:

where extracts the first two components. This is a linear constraint on the elements of . Using at least two non-parallel cylinder axes, we obtain a system of equations for solving , for example by exploiting the fact that is orthogonal to certain known vectors.

Since the four directions are known and non-coplanar, the rotation matrix can be recovered up to only a finite number of ambiguous solutions, typically two, corresponding to a reflection. The additional cylinders provide redundancy and allow these spurious solutions to be rejected through consistency with the width constraints described below.

Translation estimation:Once is known, each cylinder provides two types of measurements related to :

1. Axis-line position:the projection line must pass through the projection of the marker center,.This gives a linear constraint involving 、 and .
2. Cylinder width: the measured width of cylinder is related to , , and through the tangent-plane geometry. Its exact relationship is given in Eq. (A6), where is a known factor depending only on the rotation and the axis direction . This equation can be rearranged to solve for the depth. In fact, because the four radii are all distinct, each width provides an independent estimate of . The resulting overdetermined system—four equations for three unknowns—can be solved in the least-squares sense, yielding a robust estimate of .
3. Identification of cylinder correspondences: a key step is to associate each image line pair with the correct cylinder index . Since the radii are different, the apparent widths generally preserve the same ordering as , assuming moderate variation in depth and orientation. We may therefore sort the measured widths and match them to the sorted radii to establish the correspondences. Any remaining ambiguity, for example due to larger viewpoint changes, can be resolved by checking geometric consistency of the recovered pose under all candidate permutations: the correct assignment yields a geometrically valid pose with positive depth and small reprojection error.

**1.5 Uniqueness Analysis**

A central claim of this work is that the designed marker admits a unique 6-DoF pose solution from a single view. Below, we justify this claim by analyzing the potential ambiguities.

In classical perspective pose estimation based on line correspondences (the PnL problem), multiple solutions often arise because of the nonlinearity of the projection equations. For a general configuration of four lines, there may exist up to eight solutions satisfying the geometric constraints.[3]However, the present problem introduces additional metric constraints that greatly reduce the solution space.

Rotation ambiguity: Without the radius constraints, the rotation matrix can generally only be determined up to a twofold ambiguity, namely the well-known reflection ambiguity. This is because if is a solution, then a reflected configuration may produce the same projected lines. In our setup, the tetrahedral arrangement of the cylinder axes is symmetric under certain reflections, so additional information is required to break this symmetry. The unequal radii provide exactly this information: the apparent width depends not only on the axis direction, but also on each cylinder’s distance to the X-ray source. Under the reflected pose, the relative source-to-cylinder distances are altered—the cylinders that were originally closer become farther, and vice versa—thus changing the width ratios. As a result, of the two candidate rotations, only one is consistent with the width ratios implied by the known radii.

Translation ambiguity:Once is fixed, the translation scale may still remain ambiguous in purely geometric methods based only on lines, since proportionally scaling both the object and its distance can leave the line projections unchanged. Here, the absolute radii provide the missing scale information. The width equation explicitly involves the reference-point depth and the axis direction , and because the apparent width varies inversely with absolute scale, the scale is uniquely fixed.

Numerical uniqueness:With four cylinders, we haveindependent measurements—two from each line direction and one width measurement per cylinder—to solve for 6 unknowns. This overdetermined system ensures a unique least-squares solution in the presence of noise, and the residuals can also be used to verify the correctness of the correspondences.

**1.6 Robustness Analysis**

The uniqueness analysis in Section 1.5 assumes that the projection features of all four cylinders can be ideally extracted. This section further discusses feature degradation or overlap that may occur in practical imaging, and argues that the geometric redundancy of the marker is sufficient to handle such extreme poses.

Guarantee on the number of visible cylinders. The four cylinder axis directions are chosen as the unit vectors from the center of a cube toward the vertices of a regular tetrahedron. This configuration has an important property: for any given viewing direction (i.e., the optical axis direction), at least three of the four directions are not parallel to the viewing direction (that is, the angle is neither 0 nor ), and no two directions are collinear. Specifically, let the viewing direction unit vector be (the Z-axis of the camera coordinate system). Then the cosine of the angle between each cylinder axis and the optical axis is . Because the four vectors are symmetrically distributed, at most one vector can be parallel or antiparallel to , while the other three must form substantial angles with it.

Proof： The pairwise angle between any two vertex directions of a regular tetrahedron is Let the four direction vectors be ,satisfying:

For any viewing direction with , suppose there exist such that Then both and are parallel to , which implies that and are parallel to each other. Their mutual angle would therefore be either or , contradicting the tetrahedral conditionHence, at most one can be parallel to .Therefore, at most one cylinder axis can be parallel to the optical axis. In that case, the projection of that cylinder degenerates into a disk-like shape and cannot provide axis-direction information. However, the projections of the other three cylinders remain as clear lines and still provide sufficient geometric constraints.

Extreme case: one cylinder axis nearly aligned with the Z -axis.Let the axis direction of cylinder be and suppose it is approximately parallel to the optical axis , i.e., In this case, the projection of that cylinder is approximately a family of ellipses with very small eccentricity, so its centerline cannot be stably extracted, and it therefore loses its directional constraint on the rotation matrix. However, the axis directions of the other three cylinders still form sufficiently large angles with the optical axis, and their projected lines remain clearly distinguishable. The corresponding direction vectors can still be recovered via the vanishing-point method.Since any three of the four tetrahedral directions are linearly independent, the rotation matrix can be uniquely determined from the three known directions alone, up to at most a reflection ambiguity. That ambiguity can in turn be removed using the width information. Therefore, this degeneracy does not affect the solvability of the pose.

Extreme case: overlap between the projections of two cylinders. In this situation, edge ambiguity may occur, making it difficult to accurately extract their respective centerlines and widths. However, due to the spatial separation inherent in the regular-tetrahedral configuration, such overlap can only occur under specific viewing angles and typically involves only one pair of cylinders. Suppose cylinders and overlap, while the projections of cylinders and remain clearly separated. In this case, the association of the overlapping cylinders can be inferred as follows.

First, use the projection information from the non-overlapping cylinders and to obtain an initial estimate of the rotation matrix and translation vector . Specifically, the projected axis directions of and determine two degrees of freedom of , while their width measurements constrain the possible depth range. Then, for the cylinders and to be distinguished, their predicted projection centerline directions under the estimated pose, in image coordinates, are given by:

Then, the predicted positions are compared with the composite edges in the actual overlapping region of the image. Since cylinders and have different radii (), their projected widths under the same pose should differ significantly. By matching the width ordering and the edge-gradient distribution, the front–back relationship in the overlap can be distinguished, and the correct correspondence can be assigned.

**1.7 Summary of the Algorithm**

The complete pose estimation procedure can be summarized as follows:

(1) Image processing — extract the four pairs of parallel edges corresponding to the cylinder boundaries, and compute the centerline and orthogonal width of each cylinder;

(2) Correspondence matching — sort the cylinders according to , and match them to in ascending order;

(3) Rotation estimation — construct a linear system from the line normal vectors and solve for the rotation matrix (retaining two candidate rotations);

(4) Translation estimation — for each candidate , solve for using the width equations, and discard solutions with negative depth or inconsistent widths;

(5) Optimization refinement — optionally refine the pose by minimizing the reprojection error of the cylinder boundaries using nonlinear optimization (e.g., the Levenberg–Marquardt method).

The output is the unique 6-DOF pose of the marker relative to the X-ray source.

**2 Design of the Machine-Learning-Based Pose Estimation Algorithm**

Considering the convenience and cost-effectiveness of algorithm development, this study adopts a machine-learning-based approach for pose estimation. In this section, we establish machine-learning-based pose estimation algorithms for the marker under both X-ray and optical imaging modalitiesThe proposed algorithm adopts a cascaded framework that combines learnable visual perception with explicit geometric constraints. A deep neural network is used to extract pose-related local observations from the images, including the marker target region, the three tip keypoints, and rotation priors. Based on the known 3D model, camera intrinsic parameters, and rigid-body transformation constraints, the geometric module then recovers the final 6-DoF pose.

Compared with methods that directly regress pose parameters in an end-to-end manner, this study restricts the visual recognition task to geometrically meaningful entities that can be stably annotated and reliably verified, enabling quality control of the network outputs through reprojection error, positive-depth constraints, and rigid-body consistency.

**2.1 Coordinate System Definition and Overall Pipeline**

Let the marker object coordinate system be denoted by , and the sensor coordinate system by . Under the X-ray modality, represents the X-ray source coordinate system; under the optical modality, represents the camera coordinate system. The algorithm output is the homogeneous rigid transformation , where and .In the X-ray branch, the cropped perspective image ROI is taken as input to predict the three-axis rotation prior of the marker. Translation is then recovered by combining the cylindrical projection geometry, central projection position, and physical scale constraints described in Section 2.1. In the optical branch, the marker is first localized by YOLOv11, after which the three tip keypoints are predicted within the expanded ROI, and a pose regression branch is used to provide the rotation prior.In the online stage, is jointly estimated by a geometric optimizer, and the pose of the target object is then obtained through the fixed mounting relationship determined by offline calibration.

**2.2 X-ray Modality Pose Regression Network**

The X-ray branch is designed to estimate the rotational pose of the marker from a single perspective image and to provide a stable initialization for the analytical geometric pose solver described in Section 2.1.The input DICOM image is first processed by grayscale window normalization and background suppression, and is then cropped into a fixed-size ROI according to the projected center of the marker. The ROI is subsequently fed into a ResNet50/Hopenet pose regression network after bilinear resampling, center cropping, and ImageNet mean–variance normalization.The network backbone is composed of ResNet50 residual blocks. A global representation is obtained through a global average pooling layer at the end of the backbone, followed by three mutually independent classification-regression heads for yaw, pitch, and roll.[4,5]Each output head predicts logits over angle bins, with the bins covering the range .

Let the network output for the-th rotation axis, , be denoted by , and let denote the center of the -th angle bin. The probability of each bin and the continuous angle prediction are obtained via the circular expectation:

The network outputs are converted into three-axis Euler angles according to the axis mapping , \(Y=\mathrm{Yaw}\), and \(Z=\mathrm{Roll}\), and are further used to construct the rotation matrix:

Due to the drift of the IMU yaw angle, the X-ray branch is trained with the - and -axes as the primary supervision targets. In the experimental setting, the loss weights are set to , , , the weight of the continuous-angle term is , and the weight of the geometric consistency term is set to 0.The rotation prediction is then used as the initialization for the geometric optimization in Section 2.1, enabling translation recovery under the constraints of the cylinder centerline, width, and depth.

**2.3 Optical-Modality Object Detection and Keypoint Localization**

Optical images contain checkerboard backgrounds, connecting rods, tabletop textures, and illumination variations. To address these challenges, this paper adopts a two-stage visual perception pipeline.In the first stage, YOLOv11 is employed to detect the marker bounding box in the full image. The candidate box with the highest confidence score is selected and then expanded by 10%–20% to obtain a stable region of interest (ROI). This ROI is subsequently used as the input for both keypoint detection and pose regression.

In the second stage, a heatmap-based keypoint detection network is used to predict the three thin-rod tip points of the marker. The network backbone follows a U-Net encoder–decoder architecture, consisting of two downsampling modules, three residual blocks, and the corresponding upsampling modules, with a base channel number of 32.[6]The output layer is a 3×3 convolution that produces heatmap channels, corresponding to the right, left, and middle tip points, respectively. The supervised heatmap for the -th keypoint is defined using a two-dimensional Gaussian distribution:

During inference, max-pooling-based non-maximum suppression is applied to the heatmap of each channel, and the local peak response is selected as the keypoint coordinate. The corresponding response value is recorded as the confidence score of that keypoint. Since the keypoints are predicted in the ROI coordinate system, they are mapped back to the original image coordinates according to the position of the detected bounding box and the input scaling factor.Let the top-left corner of the expanded ROI be , the original ROI width and height be  and , and the network input width and height be and . If the predicted coordinate in the ROI is , then the inverse coordinate transformation is given by:

The three recovered 2D points, together with the three tip points in the 3D marker model, form the 3D–2D correspondences. If the confidence of the detected marker base center or cube corner points exceeds a predefined threshold, these points can be incorporated into the correspondence set, thus providing stronger translation and depth constraints for subsequent PnP or least-squares optimization.

**2.4 Pose Prior and Geometric Pose Fusion**

The optical ROI is simultaneously fed into a pose regression network to predict the three-axis Euler angles of the marker. This network is consistent with the X-ray pose branch and adopts the binned angle regression scheme of ResNet50/Hopenet.The pose regression result is not used as the final pose output; instead, it serves as a rotational prior for geometric optimization. Let the 2D points detected by keypoint estimation be , the known 3D tip points be , the camera intrinsic matrix be, and the rotation matrix predicted by pose regression be . The online pose is estimated by the following objective function:

where denotes the perspective projection function, is the geodesic distance between rotation matrices, is the weight of the rotation prior, and is the number of correspondences involved in the optimization.When only the three tip points are available, can significantly constrain the feasible rotation space and reduce the instability of three-point PnP. When the base center or corner points are incorporated, the optimization term is naturally extended to an overdetermined reprojection problem with .In practice, the solution is initialized using `solvePnP` and then refined via Levenberg–Marquardt least-squares optimization. The final solution retained is the one with the smallest reprojection error and positive depth for all points.

After obtaining the marker pose in the current image, the fixed mounting relationship obtained from offline calibration is used to infer the target object pose:

This transformation chain converts the marker observation obtained by machine learning into the spatial pose of the wooden block or surgical instrument, enabling the target 3D model to be projected onto the optical image according to the camera intrinsics.

**2.5 Loss Function Design**

The pose regression loss consists of a binned classification term, a continuous angle regression term, and an optional rotation geometric consistency term.The classification term supervises the angular bin assignment, the continuous term constrains the shortest angular difference on the circle, and the geometric term directly penalizes the geodesic distance between the predicted rotation matrix and the ground-truth rotation matrix. The overall loss is defined as:

Here, ,denotes the weight for each axis, is the weight of the continuous regression term, and is the weight of the rotation geometric consistency term. In X-ray training, the settings , , , and are adopted to accommodate the unstable Z-axis yaw labels under the data acquisition conditions. In optical pose training, are used to learn the full three-axis pose.

The keypoint detection loss is defined as the mean binary cross-entropy between the predicted heatmap of each channel and the corresponding Gaussian ground-truth heatmap:

During validation, the mean keypoint precision under 2-pixel and 4-pixel thresholds is also computed for selecting the best model weights. The YOLOv11 detection branch is trained with the standard object detection losses, including bounding box regression, classification, and distribution focal loss. This branch is used only to provide the ROI and does not participate in the final pose loss. In the online fusion stage, no additional learnable parameters are introduced; pose quality is jointly assessed using the reprojection RMSE, keypoint confidence, positive-depth constraints, and the rotation prior residual.

**2.6 Training Strategy and Hyperparameter Configuration**

The models for different modalities are trained independently. The X-ray pose branch is trained using X-ray ROIs together with their IMU/geometric annotations. The optical detection branch is trained with marker bounding-box annotations using YOLOv11. The optical keypoint branch is trained as a heatmap-based model using manually annotated coordinates of the three tip keypoints. The optical pose branch is supervised by the camera-to-marker relative pose obtained through physical measurement and subsequent PnP refinement. The two modalities do not share low-level image features, and all outputs are unified under the same marker object coordinate system.

All deep learning models are trained on a single NVIDIA GeForce RTX 4090 GPU using the CUDA version of PyTorch, with automatic mixed precision enabled for pose regression training. For pose regression models, the checkpoint with the lowest validation loss is retained, while for keypoint detection models, the checkpoint with the highest validation mAP is selected. The random seed is set to 42 for pose regression experiments and 2022 for keypoint detection experiments to ensure reproducibility in data splitting and training procedures.

The specific training hyperparameter settings are as follows. The YOLOv11 object detection branch takes the full optical image as input, with an input resolution of 640 × 640. It is trained for 100 epochs with a batch size of 16 and an initial learning rate of . The confidence threshold is set to 0.25 and the IoU threshold to 0.50. This branch outputs only the marker bounding box, which is then expanded by 10%–20% and used as the ROI for subsequent keypoint detection and pose regression.

The keypoint detection branch takes ROI images as input and adopts a U-Net-style encoder–decoder backbone with a 3-channel heatmap output. Training is conducted for 100 epochs with a batch size of 16, using the Adam optimizer, a learning rate of , a heatmap sigma of 2, a validation split of 0.25, and . The validation mAP under 2-pixel and 4-pixel thresholds is used as the model selection criterion.

The pose regression branch adopts a ResNet50/Hopenet architecture. After random shuffling, the dataset is split into training, validation, and test sets at a ratio of 8:1:1. The input ROI size is set to 1024 × 1024, with ROI margin=0.08 and roi_min_side=320. Training is performed for 120 epochs with a batch size of 6, using the AdamW optimizer, a learning rate of , and a weight decay of .The angle binning range is set to with a bin width of . The learning rate schedule adopts a 5-epoch warm-up followed by cosine annealing, with a minimum learning rate of . For X-ray training, the loss weights are set to , , and. For optical pose training, equal supervision is applied to all three axes when the Z-axis labels are reliable.

Data augmentation during training is configured separately for each modality. The X-ray branch uses random grayscale window perturbation, mild affine rotation, random scaling, Gaussian noise, and local occlusion to simulate variations in exposure, positioning, and metal occlusion conditions. The optical detection and keypoint branches employ brightness, contrast, and saturation perturbation, as well as random cropping, motion blur, and Gaussian noise. Among these, geometric augmentations are applied with synchronized updates to the keypoint annotations, while intensity-based augmentations do not alter the pose labels.

The geometric fusion module contains no learnable parameters. During inference, the optimization is initialized with solvePnP, followed by Levenberg–Marquardt / least-squares refinement that minimizes the reprojection error together with the rotation-prior residual. The weight is selected according to the validation-set reprojection error. The optimization only accepts solutions with positive depth and outputs the current image pose as well as the target object pose .

Inference is executed in a fixed sequence. After ROI cropping, the X-ray image is fed into the pose regression network to predict the X/Y/Z angles, which are then combined with the X-ray projection geometry to recover the translation. For the optical image, YOLOv11 first generates the marker bounding box, after which the keypoint detection network predicts the three tip points and the pose regression network outputs a rotation prior. The geometric optimizer then estimates , and the target object pose is obtained through a fixed transformation. Final rendering uses only those results that satisfy the positive-depth constraint and whose reprojection error is below an empirical threshold, thus reducing the impact of false detections or keypoint drift on MR overlay visualization.

**3 Data Acquisition**

**3.1 X-ray Data Acquisition**

X-ray data acquisition was conducted on a GE Definium 6000 system. The imaging parameters were set as follows: tube voltage 120 kV, tube current 400 mA, and the source-to-detector distance (SDD) was fixed at 100 cm. The detector field of view was 41 cm × 41 cm.

To accurately obtain the ground-truth 6-DoF pose of the marker in three-dimensional space, this study designed an IMU-based pose reference frame fixed with Kirschner wires.

Sensor calibration and fixation:A WitMotion BWT901C 9-axis Bluetooth attitude sensor was used. Two Kirschner wires were selected as connecting rods and aligned with the central axes of the handles on both sides of the sensor. The sensor was secured at the upper and lower positions using 2.5 mm × 120 mm self-locking nylon cable ties, and cyanoacrylate adhesive (502 glue) was applied to reinforce the fixation and prevent micromotion (Fig. 3a).Notably, in this study, the IMU sensor was not used to provide the absolute pose with respect to the X-ray source. Instead, it served as an orientation recorder for the marker’s own object coordinate system. Because the IMU was rigidly attached to the marker via Kirschner wires, the Euler angles output by the IMU effectively and uniquely determined the marker’s relative rotation matrix with respect to its own initial pose.

Parallelism calibration: We installed a screw-and-nut adjustment structure beneath the sensor and fine-tuned the angle of the Kirschner wires by tightening the screw. Using a vernier caliper, we ensured that the distances between the central axes of the upper and lower Kirschner wires were both 5.1 mm to correct axial deviations caused by assembly stress. Finally, we fixed the mechanical structure with hot-melt adhesive.

Marker installation: We mounted the marker model to be tested on the Kirschner wire extending from the right side of the sensor, ensuring that the bottom of the marker was aligned with the bottom surface of the sensor. We also captured optical photographs for documentation to verify the accuracy of the relative installation angle.

Coordinate system definition: We defined the marker object coordinate system to coincide with the IMU sensor coordinate system. We placed the origin at the geometric center of the sensor, defined the x-axis to point upward along the long axis of the sensor, and defined the y-axis to point leftward perpendicular to the sensor plane. Following the right-hand rule, the z-axis pointed outward perpendicular to the sensor plane. Therefore, the data corresponding to each X-ray image were the Euler angles describing the rotation

**3.2 Optical data acquisition**

Optical data acquisition was performed to simulate marker observation from the perspective of a mixed reality (MR) head-mounted display. The experiment was conducted under controlled indoor lighting conditions, using a Canon R7 camera as the optical sensor.

To establish a spatial coordinate reference, 6 cm × 6 cm printed black-and-white checkerboard sheets were laid on both the tabletop and the floor as reference planes. Data acquisition followed the protocol below.

Spatial anchoring: The upper-left corner of the camera reference plane was defined as the coordinate origin. A plumb line was used to confirm the alignment between the marker reference plane and the camera reference plane: the , , and grid positions on the marker reference plane were aligned in XY coordinates with the , , and grid positions on the camera reference plane, respectively. Based on this relationship, the center point of the marker was determined to be at . The plumb line was also used to determine the ground-projected coordinate position of the center point of the camera tripod, thus eliminating systematic error caused by optical-axis tilt (Fig. 3d).

Position measurement: Using a measuring tape, we measured and recorded the height of the camera optical center relative to the reference plane as 88.5 cm, 101.5 cm, and 112.5 cm. The horizontal-plane coordinates of the marker reference center were recorded as.

Multi-view imaging: With the camera orientation fixed, the marker was moved to different positions under various XYZ coordinate combinations, and optical images containing the complete marker were acquired (Fig. 3e). For each position, the corresponding physical measurements were recorded as the initial ground-truth values for location. A total of 194 datasets were collected.

**4 Dataset construction and preprocessing**

**4.1 X-ray image dataset**

The X-ray image dataset comprised 100 valid samples (101 were originally acquired, and 1 was discarded because the height reading was missing). Each sample included one fluoroscopic X-ray image and its corresponding 6-degree-of-freedom pose annotation.

The pose annotation was composed of two parts: the rotational component was derived from the Euler angles (X–Y–Z intrinsic rotation order) output by the IMU sensor (WitMotion BWT901C) and converted into a rotation matrix; the translational component consisted of depth , obtained from the physical measurement scale reading provided by the X-ray workstation, and in-plane position , which was back-calculated from the offset between the projected marker center and the principal point, together with the known source-to-detector distance.

Preprocessing pipeline:（1）The original DICOM images were linearly mapped to the 16-bit grayscale range and then normalized to . （2）Image numbering verification and data alignment were performed using the lead-character identifiers as references. （3）Each image was cropped to a fixed-size ROI centered on the marker projection (e.g., 1024 × 1024 pixels), while preserving the aspect ratio. （4） The projected position of the marker center in normalized image coordinates was calculated and stored for each cropped image. （5）The Euler-angle annotations were converted into rotation matrices and, if needed, further transformed into quaternions or a continuous 6D representation.[7]

Dataset split:After randomization according to the acquisition order (with random rotations of the gimbal platform), the dataset was divided into training, validation, and test sets at a ratio of 8:1:1, corresponding to 80, 10, and 10 samples, respectively. During the split, care was taken to ensure that the Euler-angle distributions in each subset covered a roughly uniform angular range, so as to avoid systematic bias toward specific orientations. To enable a more comprehensive evaluation of the error distribution under limited-sample conditions, final pose inference was performed on all 100 samples, and the error statistics for each subset were reported independently.

**4.2 Optical image dataset**

The optical image dataset consisted of 194 valid samples. Each sample included one optical image and the corresponding initial estimate of the relative pose between the camera and the marker. The initial pose was obtained by transforming the physical measurements into a unified checkerboard reference-plane coordinate system, using the measured camera heights (88.5, 101.5, and 112.5 cm) and the marker planar coordinates (6, 48, 78 ).

Preprocessing pipeline:（1）White-balance correction and histogram equalization were applied to compensate for indoor illumination differences across acquisition batches.（2） Taking the origin of the camera reference-plane coordinate system as the baseline, the image coordinates of the marker center were calculated for each image.（3）The physical measurements were converted into an initial 6-degree-of-freedom pose of the marker in the camera coordinate system.（4） The initial pose was further refined using a PnP procedure: based on the known corner coordinates of the marker cube and the detected image points, the reprojection error was optimized with the Levenberg–Marquardt algorithm, and the refined pose was used as the supervision label for subsequent training.

Dataset split:Similar to the X-ray dataset, the optical dataset was randomly divided into training, validation, and test sets in an 8:1:1 ratio, resulting in 155, 19, and 20 samples, respectively. The three camera heights were maintained in proportional distribution across the training, validation, and test subsets. Final pose inference was performed on all 194 samples, and the error statistics for each subset were reported independently.

**4.3 Cross-modal pairing and data augmentation**

Cross-modal pairing:The X-ray and optical images were not acquired in strict frame-by-frame temporal synchronization. However, their pose annotations were defined under the same marker object coordinate system. Therefore, when training a dual-modality model, the X-ray and optical branches could be trained independently on their respective datasets, while sharing the same rotation and translation regression objectives at the loss-function level. Alternatively, image-level correspondence between the two modalities could be established using generative approaches, such as differentiable rendering based on the CAD model of the marker.[7]

Data augmentation:For the X-ray branch, data augmentation included random rotation (±15°), random scaling (0.9×–1.1×), Gaussian noise (σ ≤ 0.02 in normalized intensity), and simulated local occlusion using random black rectangles with an area of no more than 15% of the image. For the optical branch, augmentation included color jittering (brightness ±20%, contrast ±20%, saturation ±15%), random rotation and scaling (same ranges as above), and motion blur with a kernel size of up to 5 pixels. The pose labels of the augmented samples were synchronously updated through chained transformation matrices.

**Reference**

1. Wokes, D. S. & Palmer, P. L. Perspective Reconstruction of a Spheroid from an Image Plane Ellipse. *Int J Comput Vis* **90**, 369–379 (2010).

2. Gaudillière, V., Simon, G. & Berger, M.-O. Perspective-1-Ellipsoid: Formulation, Analysis and Solutions of the Camera Pose Estimation Problem from One Ellipse-Ellipsoid Correspondence. Preprint at https://doi.org/10.48550/arXiv.2208.12513 (2023).

3. Ansar, A. & Daniilidis, K. Linear pose estimation from points or lines. *IEEE Trans. Pattern Anal. Machine Intell.* **25**, 578–589 (2003).

4. He, K., Zhang, X., Ren, S. & Sun, J. Deep Residual Learning for Image Recognition. in *2016 IEEE Conference on Computer Vision and Pattern Recognition (CVPR)* 770–778 (IEEE, Las Vegas, NV, USA, 2016). doi:10.1109/CVPR.2016.90.

5. Ruiz, N., Chong, E. & Rehg, J. M. Fine-Grained Head Pose Estimation Without Keypoints. in *2018 IEEE/CVF Conference on Computer Vision and Pattern Recognition Workshops (CVPRW)* 2155–215509 (IEEE, Salt Lake City, UT, USA, 2018). doi:10.1109/CVPRW.2018.00281.

6. Ronneberger, O., Fischer, P. & Brox, T. U-Net: Convolutional Networks for Biomedical Image Segmentation. in *Medical Image Computing and Computer-Assisted Intervention – MICCAI 2015* (eds Navab, N., Hornegger, J., Wells, W. M. & Frangi, A. F.) 234–241 (Springer International Publishing, Cham, 2015). doi:10.1007/978-3-319-24574-4_28.

7. Gopalakrishnan, V., Dey, N. & Golland, P. Intraoperative 2D/3D Image Registration via Differentiable X-ray Rendering. in *2024 IEEE/CVF Conference on Computer Vision and Pattern Recognition (CVPR)* 11662–11672 (2024). doi:10.1109/cvpr52733.2024.01108.
